# Supplementary material
Source: publisher figshare collection journal article supplement (https://frontiersin.figshare.com/ndownloader/files/25321967)
Supplement: Supplementary file [file 25321967]

# Cuestionario estudio Neuromarketing

**\*Obligatorio**

1. Identificador \*

---

Recuerdo espontáneo

2. ¿Recuerdas algunos de los mensajes que transmiten estos anuncios? (se trata de la idea más destacada del anuncio, lo que quiere comunicar o transmitir el anunciante con el spot) \*

---

---

---

---

---

3. ¿Cuáles fueron los que más te emocionaron y causaron agrado? \*

---

---

---

---

---

¿Has sentido alguna de las siguientes emociones en alguno de ellos?

## 4. Tristeza \*

Marca solo un óvalo.

|      | 1                     | 2                     | 3                     | 4                     | 5                     |       |
|------|-----------------------|-----------------------|-----------------------|-----------------------|-----------------------|-------|
| Nada | <input type="radio"/> | <input type="radio"/> | <input type="radio"/> | <input type="radio"/> | <input type="radio"/> | Mucho |

## 5. (Tristeza) Describe qué anuncio o qué imágenes te provocaron esta emoción \*

---

---

---

---

---

## 6. Ira \*

Marca solo un óvalo.

|      | 1                     | 2                     | 3                     | 4                     | 5                     |       |
|------|-----------------------|-----------------------|-----------------------|-----------------------|-----------------------|-------|
| Nada | <input type="radio"/> | <input type="radio"/> | <input type="radio"/> | <input type="radio"/> | <input type="radio"/> | Mucho |

## 7. (Ira) Describe qué anuncio o qué imágenes te provocaron esta emoción \*

---

## 8. Sorpresa \*

Marca solo un óvalo.

|      | 1                     | 2                     | 3                     | 4                     | 5                     |       |
|------|-----------------------|-----------------------|-----------------------|-----------------------|-----------------------|-------|
| Nada | <input type="radio"/> | <input type="radio"/> | <input type="radio"/> | <input type="radio"/> | <input type="radio"/> | Mucho |

9. (Sorpresa) Describe qué anuncio o qué imágenes te provocaron esta emoción \*

---

10. Asco \*

*Marca solo un óvalo.*

|      | 1                     | 2                     | 3                     | 4                     | 5                     |       |
|------|-----------------------|-----------------------|-----------------------|-----------------------|-----------------------|-------|
| Nada | <input type="radio"/> | <input type="radio"/> | <input type="radio"/> | <input type="radio"/> | <input type="radio"/> | Mucho |

11. (Asco) Describe qué anuncio o qué imágenes te provocaron esta emoción \*

---

12. ¿Qué secuencias/imágenes han sido más significativas para ti? \*

---

---

---

---

---

Recuerdo Sugerido

13. De los siguientes temas ¿cuáles recuerdas haber visto en estos anuncios? \*

*Selecciona todos los que correspondan.*

- ☐ Violencia de género
- ☐ Exceso de velocidad al volante
- ☐ Bullying (acoso escolar)
- ☐ Alcohol y conducción
- ☐ Machismo
- ☐ Consumo de cocaína
- ☐ Abuso infantil
- ☐ Racismo
- ☐ Ecología/desforestación
- ☐ Consumo de drogas y alcohol
- ☐ Maltrato animal
- ☐ Uso del móvil al volante
- ☐ Cáncer
- ☐ Inmigración
- ☐ Maltrato infantil
- ☐ Despistes en la carretera
- ☐ Tratamiento de adicciones
- ☐ Mobbing (acoso laboral)

Recuerdo Sugerido - De las siguientes situaciones ¿cuáles recuerdas haber visto en estos anuncios? ¿con qué temas relacionas las situaciones que recuerdas?

Un niño de cristal que se rompe al chocar con el parachoques de un coche

14. Recuerdas esta situación \*

*Marca solo un óvalo.*

- ☐ Sí
- ☐ No

## 15. Temas con los que relacionas esta situación \*

*Selecciona todos los que correspondan.*

- ☐ Violencia de género
- ☐ Exceso de velocidad al volante
- ☐ Bullying (acoso escolar)
- ☐ Alcohol y conducción
- ☐ Machismo
- ☐ Consumo de cocaína
- ☐ Abuso infantil
- ☐ Racismo
- ☐ Ecología/desforestación
- ☐ Consumo de drogas y alcohol
- ☐ Maltrato animal
- ☐ Uso del móvil al volante
- ☐ Cáncer
- ☐ Inmigración
- ☐ Maltrato infantil
- ☐ Despistes en la carretera
- ☐ Tratamiento de adicciones
- ☐ Mobbing (acoso laboral)

Otro: ☐ \_\_\_\_\_

Un policía hablando de los riesgos de no respetar los límites de velocidad

## 16. Recuerdas esta situación \*

*Marca solo un óvalo.*

- ☐ Sí
- ☐ No

## 17. Temas con los que relacionas estas situación \*

*Selecciona todos los que correspondan.*

- ☐ Violencia de género
- ☐ Exceso de velocidad al volante
- ☐ Bullying (acoso escolar)
- ☐ Alcohol y conducción
- ☐ Machismo
- ☐ Consumo de cocaína
- ☐ Abuso infantil
- ☐ Racismo
- ☐ Ecología/desforestación
- ☐ Consumo de drogas y alcohol
- ☐ Maltrato animal
- ☐ Uso del móvil al volante
- ☐ Cáncer
- ☐ Inmigración
- ☐ Maltrato infantil
- ☐ Despistes en la carretera
- ☐ Tratamiento de adicciones
- ☐ Mobbing (acoso laboral)

Otro: ☐ \_\_\_\_\_

Un niño que le lleva una botella de cerveza a su padre en una fiesta

## 18. Recuerdas esta situación \*

*Marca solo un óvalo.*

- ☐ Sí
- ☐ No

## 19. Temas con los que relacionas estas situación \*

*Selecciona todos los que correspondan.*

- ☐ Violencia de género
- ☐ Exceso de velocidad al volante
- ☐ Bullying (acoso escolar)
- ☐ Alcohol y conducción
- ☐ Machismo
- ☐ Consumo de cocaína
- ☐ Abuso infantil
- ☐ Racismo
- ☐ Ecología/desforestación
- ☐ Consumo de drogas y alcohol
- ☐ Maltrato animal
- ☐ Uso del móvil al volante
- ☐ Cáncer
- ☐ Inmigración
- ☐ Maltrato infantil
- ☐ Despistes en la carretera
- ☐ Tratamiento de adicciones
- ☐ Mobbing (acoso laboral)

Otro: ☐ \_\_\_\_\_

Imágenes rebobinando las escenas de un atropello

## 20. Recuerdas esta situación \*

*Marca solo un óvalo.*

- ☐ Sí
- ☐ No

## 21. Temas con los que relacionas estas situación \*

*Selecciona todos los que correspondan.*

- ☐ Violencia de género
- ☐ Exceso de velocidad al volante
- ☐ Bullying (acoso escolar)
- ☐ Alcohol y conducción
- ☐ Machismo
- ☐ Consumo de cocaína
- ☐ Abuso infantil
- ☐ Racismo
- ☐ Ecología/desforestación
- ☐ Consumo de drogas y alcohol
- ☐ Maltrato animal
- ☐ Uso del móvil al volante
- ☐ Cáncer
- ☐ Inmigración
- ☐ Maltrato infantil
- ☐ Despistes en la carretera
- ☐ Tratamiento de adicciones
- ☐ Mobbing (acoso laboral)

Otro: ☐ \_\_\_\_\_

Un hombre golpeando a una mujer mientras discuten

## 22. Recuerdas esta situación \*

*Marca solo un óvalo.*

- ☐ Sí
- ☐ No



## 23. Temas con los que relacionas estas situación \*

*Selecciona todos los que correspondan.*

- ☐ Violencia de género
- ☐ Exceso de velocidad al volante
- ☐ Bullying (acoso escolar)
- ☐ Alcohol y conducción
- ☐ Machismo
- ☐ Consumo de cocaína
- ☐ Abuso infantil
- ☐ Racismo
- ☐ Ecología/desforestación
- ☐ Consumo de drogas y alcohol
- ☐ Maltrato animal
- ☐ Uso del móvil al volante
- ☐ Cáncer
- ☐ Inmigración
- ☐ Maltrato infantil
- ☐ Despistes en la carretera
- ☐ Tratamiento de adicciones
- ☐ Mobbing (acoso laboral)

Otro: ☐ \_\_\_\_\_

Una chica pinchándose para inyectarse droga

## 24. Recuerdas esta situación \*

*Marca solo un óvalo.*

- ☐ Sí
- ☐ No

## 25. Temas con los que relacionas estas situación \*

*Selecciona todos los que correspondan.*

- ☐ Violencia de género
- ☐ Exceso de velocidad al volante
- ☐ Bullying (acoso escolar)
- ☐ Alcohol y conducción
- ☐ Machismo
- ☐ Consumo de cocaína
- ☐ Abuso infantil
- ☐ Racismo
- ☐ Ecología/desforestación
- ☐ Consumo de drogas y alcohol
- ☐ Maltrato animal
- ☐ Uso del móvil al volante
- ☐ Cáncer
- ☐ Inmigración
- ☐ Maltrato infantil
- ☐ Despistes en la carretera
- ☐ Tratamiento de adicciones
- ☐ Mobbing (acoso laboral)

Otro: ☐ \_\_\_\_\_

Un sanitario/médico hablando a cámara sobre los riesgos de las adicciones

## 26. Recuerdas esta situación \*

*Marca solo un óvalo.*

- ☐ Sí
- ☐ No

## 27. Temas con los que relacionas estas situación \*

*Selecciona todos los que correspondan.*

- ☐ Violencia de género
- ☐ Exceso de velocidad al volante
- ☐ Bullying (acoso escolar)
- ☐ Alcohol y conducción
- ☐ Machismo
- ☐ Consumo de cocaína
- ☐ Abuso infantil
- ☐ Racismo
- ☐ Ecología/desforestación
- ☐ Consumo de drogas y alcohol
- ☐ Maltrato animal
- ☐ Uso del móvil al volante
- ☐ Cáncer
- ☐ Inmigración
- ☐ Maltrato infantil
- ☐ Despistes en la carretera
- ☐ Tratamiento de adicciones
- ☐ Mobbing (acoso laboral)

Otro: ☐ \_\_\_\_\_

Unos niños peleando en el patio de un colegio

## 28. Recuerdas esta situación \*

*Marca solo un óvalo.*

- ☐ Sí
- ☐ No

29. Temas con los que relacionas estas situación \*

*Selecciona todos los que correspondan.*

- ☐ Violencia de género
- ☐ Exceso de velocidad al volante
- ☐ Bullying (acoso escolar)
- ☐ Alcohol y conducción
- ☐ Machismo
- ☐ Consumo de cocaína
- ☐ Abuso infantil
- ☐ Racismo
- ☐ Ecología/desforestación
- ☐ Consumo de drogas y alcohol
- ☐ Maltrato animal
- ☐ Uso del móvil al volante
- ☐ Cáncer
- ☐ Inmigración
- ☐ Maltrato infantil
- ☐ Despistes en la carretera
- ☐ Tratamiento de adicciones
- ☐ Mobbing (acoso laboral)

Otro: ☐ \_\_\_\_\_

Disparo en la cabeza a una pareja en un coche

30. Recuerdas esta situación \*

*Marca solo un óvalo.*

- ☐ Sí
- ☐ No

## 31. Temas con los que relacionas estas situación \*

*Selecciona todos los que correspondan.*

- ☐ Violencia de género
- ☐ Exceso de velocidad al volante
- ☐ Bullying (acoso escolar)
- ☐ Alcohol y conducción
- ☐ Machismo
- ☐ Consumo de cocaína
- ☐ Abuso infantil
- ☐ Racismo
- ☐ Ecología/desforestación
- ☐ Consumo de drogas y alcohol
- ☐ Maltrato animal
- ☐ Uso del móvil al volante
- ☐ Cáncer
- ☐ Inmigración
- ☐ Maltrato infantil
- ☐ Despistes en la carretera
- ☐ Tratamiento de adicciones
- ☐ Mobbing (acoso laboral)

Otro: ☐ \_\_\_\_\_

Un grupo de niños insultando a un compañero en el colegio

## 32. Recuerdas esta situación \*

*Marca solo un óvalo.*

- ☐ Sí
- ☐ No

## 33. Temas con los que relacionas estas situación \*

*Selecciona todos los que correspondan.*

- ☐ Violencia de género
- ☐ Exceso de velocidad al volante
- ☐ Bullying (acoso escolar)
- ☐ Alcohol y conducción
- ☐ Machismo
- ☐ Consumo de cocaína
- ☐ Abuso infantil
- ☐ Racismo
- ☐ Ecología/desforestación
- ☐ Consumo de drogas y alcohol
- ☐ Maltrato animal
- ☐ Uso del móvil al volante
- ☐ Cáncer
- ☐ Inmigración
- ☐ Maltrato infantil
- ☐ Despistes en la carretera
- ☐ Tratamiento de adicciones
- ☐ Mobbing (acoso laboral)

Otro: ☐ \_\_\_\_\_

Choque de dos coches mientras vemos al niño que va en el asiento trasero de uno de ellos

## 34. Recuerdas esta situación \*

*Marca solo un óvalo.*

- ☐ Sí
- ☐ No

## 35. Temas con los que relacionas estas situación \*

*Selecciona todos los que correspondan.*

- ☐ Violencia de género
- ☐ Exceso de velocidad al volante
- ☐ Bullying (acoso escolar)
- ☐ Alcohol y conducción
- ☐ Machismo
- ☐ Consumo de cocaína
- ☐ Abuso infantil
- ☐ Racismo
- ☐ Ecología/desforestación
- ☐ Consumo de drogas y alcohol
- ☐ Maltrato animal
- ☐ Uso del móvil al volante
- ☐ Cáncer
- ☐ Inmigración
- ☐ Maltrato infantil
- ☐ Despistes en la carretera
- ☐ Tratamiento de adicciones
- ☐ Mobbing (acoso laboral)

Otro: ☐ \_\_\_\_\_

Un conductor enviando un mensaje con el móvil mientras conduce

## 36. Recuerdas esta situación \*

*Marca solo un óvalo.*

- ☐ Sí
- ☐ No

## 37. Temas con los que relacionas estas situación \*

*Selecciona todos los que correspondan.*

- ☐ Violencia de género
- ☐ Exceso de velocidad al volante
- ☐ Bullying (acoso escolar)
- ☐ Alcohol y conducción
- ☐ Machismo
- ☐ Consumo de cocaína
- ☐ Abuso infantil
- ☐ Racismo
- ☐ Ecología/desforestación
- ☐ Consumo de drogas y alcohol
- ☐ Maltrato animal
- ☐ Uso del móvil al volante
- ☐ Cáncer
- ☐ Inmigración
- ☐ Maltrato infantil
- ☐ Despistes en la carretera
- ☐ Tratamiento de adicciones
- ☐ Mobbing (acoso laboral)

Otro: ☐ \_\_\_\_\_

Una chica joven robando en una tienda

## 38. Recuerdas esta situación \*

*Marca solo un óvalo.*

- ☐ Sí
- ☐ No



39. Temas con los que relacionas estas situación \*

*Selecciona todos los que correspondan.*

- ☐ Violencia de género
- ☐ Exceso de velocidad al volante
- ☐ Bullying (acoso escolar)
- ☐ Alcohol y conducción
- ☐ Machismo
- ☐ Consumo de cocaína
- ☐ Abuso infantil
- ☐ Racismo
- ☐ Ecología/desforestación
- ☐ Consumo de drogas y alcohol
- ☐ Maltrato animal
- ☐ Uso del móvil al volante
- ☐ Cáncer
- ☐ Inmigración
- ☐ Maltrato infantil
- ☐ Despistes en la carretera
- ☐ Tratamiento de adicciones
- ☐ Mobbing (acoso laboral)

Otro: ☐ \_\_\_\_\_

Un joven esnifando parte de su cerebro en un lavabo

40. Recuerdas esta situación \*

*Marca solo un óvalo.*

- ☐ Sí
- ☐ No

## 41. Temas con los que relacionas estas situación \*

*Selecciona todos los que correspondan.*

- ☐ Violencia de género
- ☐ Exceso de velocidad al volante
- ☐ Bullying (acoso escolar)
- ☐ Alcohol y conducción
- ☐ Machismo
- ☐ Consumo de cocaína
- ☐ Abuso infantil
- ☐ Racismo
- ☐ Ecología/desforestación
- ☐ Consumo de drogas y alcohol
- ☐ Maltrato animal
- ☐ Uso del móvil al volante
- ☐ Cáncer
- ☐ Inmigración
- ☐ Maltrato infantil
- ☐ Despistes en la carretera
- ☐ Tratamiento de adicciones
- ☐ Mobbing (acoso laboral)

Otro: ☐ \_\_\_\_\_

Un padre pegando a un niño en la calle

## 42. Recuerdas esta situación \*

*Marca solo un óvalo.*

- ☐ Sí
- ☐ No

## 43. Temas con los que relacionas estas situación \*

*Selecciona todos los que correspondan.*

- ☐ Violencia de género
- ☐ Exceso de velocidad al volante
- ☐ Bullying (acoso escolar)
- ☐ Alcohol y conducción
- ☐ Machismo
- ☐ Consumo de cocaína
- ☐ Abuso infantil
- ☐ Racismo
- ☐ Ecología/desforestación
- ☐ Consumo de drogas y alcohol
- ☐ Maltrato animal
- ☐ Uso del móvil al volante
- ☐ Cáncer
- ☐ Inmigración
- ☐ Maltrato infantil
- ☐ Despistes en la carretera
- ☐ Tratamiento de adicciones
- ☐ Mobbing (acoso laboral)

Otro: ☐ \_\_\_\_\_

---

Este contenido no ha sido creado ni aprobado por Google.

Google Formularios
